# Supplementary material
Source: PubMed Central journal article supplement (PMC3679401)
Supplement: supp_M037804_jlr.M037804-1.pdf [file supp_M037804_jlr.M037804-1.pdf]

## Supplementary Data

### Characterization and quantification of endogenous fatty acid nitroalkene metabolites in human urine

Sonia R. Salvatore, Dario A. Vitturi, Paul R.S. Baker, Gustavo Bonacci, Jeffrey R. Koenitzer, Steven R. Woodcock, Bruce A. Freeman\* and Francisco J. Schopfer\*

**Suppl. Fig 1 High resolution MS/MS data obtained upon fragmentation of the different  $^{15}\text{NO}_2\text{-CLA}$  metabolites from the effluent of  $^{15}\text{NO}_2\text{-CLA}$  Langendorff-perfused isolated rat hearts.** a) MS/MS data on peaks 1 and 2 indicate  $12\text{-}^{15}\text{NO}_2\text{-CLA}$  and  $9\text{-}^{15}\text{NO}_2\text{-CLA}$  respectively. b) Peaks 1 and 2 indicate  $\text{dinor-}10\text{-}^{15}\text{NO}_2\text{-CLA}$  and  $\text{dinor-}7\text{-}^{15}\text{NO}_2\text{-CLA}$  respectively. (c) Peaks 1 and 2 indicate  $\text{tetranor-}8\text{-}^{15}\text{NO}_2\text{-CLA}$  and  $\text{tetranor-}5\text{-}^{15}\text{NO}_2\text{-CLA}$  respectively.

**Suppl. Fig 2 Detection and confirmation of cysteine-conjugated nitro-fatty acids in urine.** a) Chromatographic profiles of  $\text{Cys-NO}_2\text{-CLA}$  and its  $\beta$ -oxidation metabolites followed in the positive ion mode. The neutral loss of 47 ( $\text{HNO}_2$ ) is indicative of the presence of an organic nitro group. b) Chromatographic profiles of  $\text{Cys-NO}_2\text{-CLA}$  and its  $\beta$ -oxidation metabolites followed as the neutral loss of 325.2 ( $\text{NO}_2\text{-CLA}$ ), 297.2 ( $\text{dinor-NO}_2\text{-CLA}$ ), 269.2 ( $\text{tetranor-NO}_2\text{-CLA}$ ) and 241.2 ( $\text{hexanor-NO}_2\text{-CLA}$ ) in the negative ion mode. c) Specific product ions and accurate mass determinations for urine- and heart-derived  $\text{Cys-NO}_2\text{-CLA}$  metabolites in the positive ion mode.

**Suppl. Scheme 1** Proposed structures for product ions obtained upon fragmentation of  $\text{Cys-NO}_2\text{-CLA}$

**Suppl Table 1**  $\text{NO}_2\text{-CLA}$  concentration in urine samples obtained from 14 healthy human volunteers. Samples were measured by quadruplicate in 2 consecutive days.

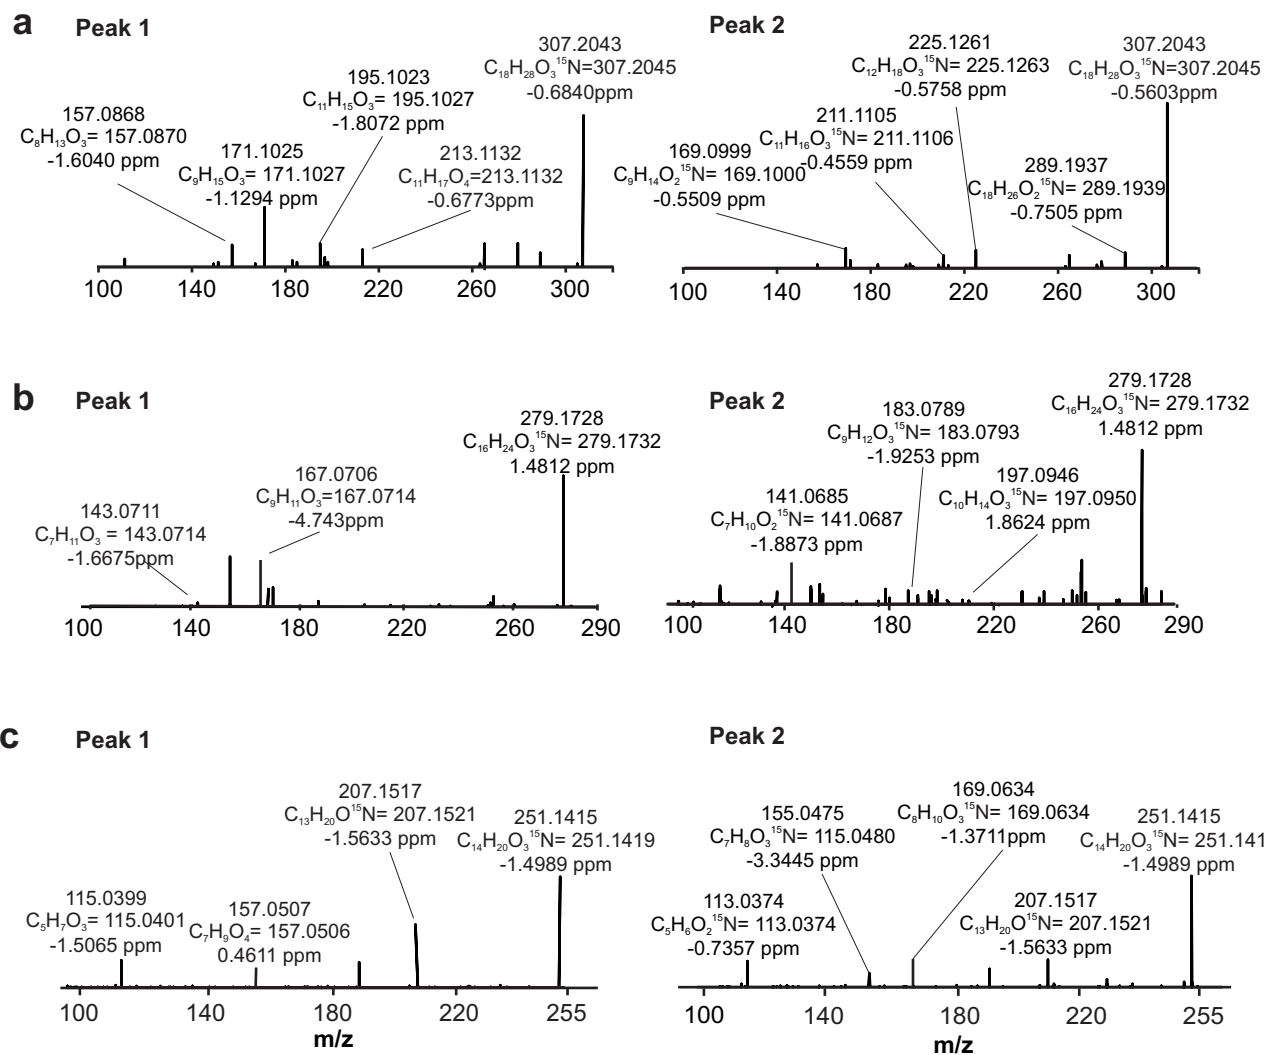

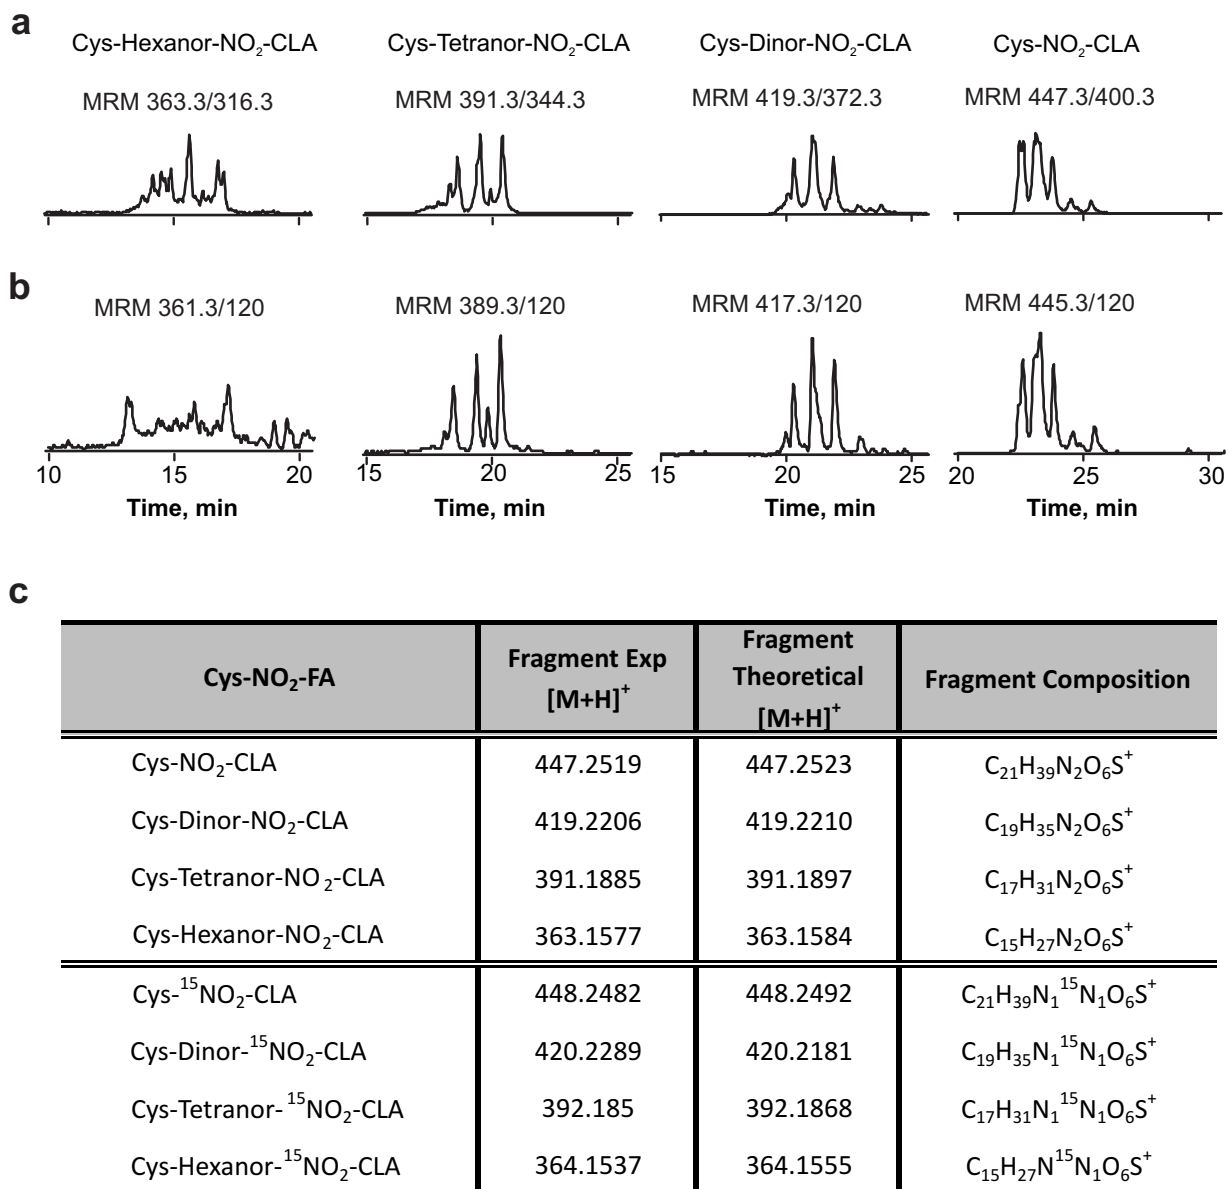

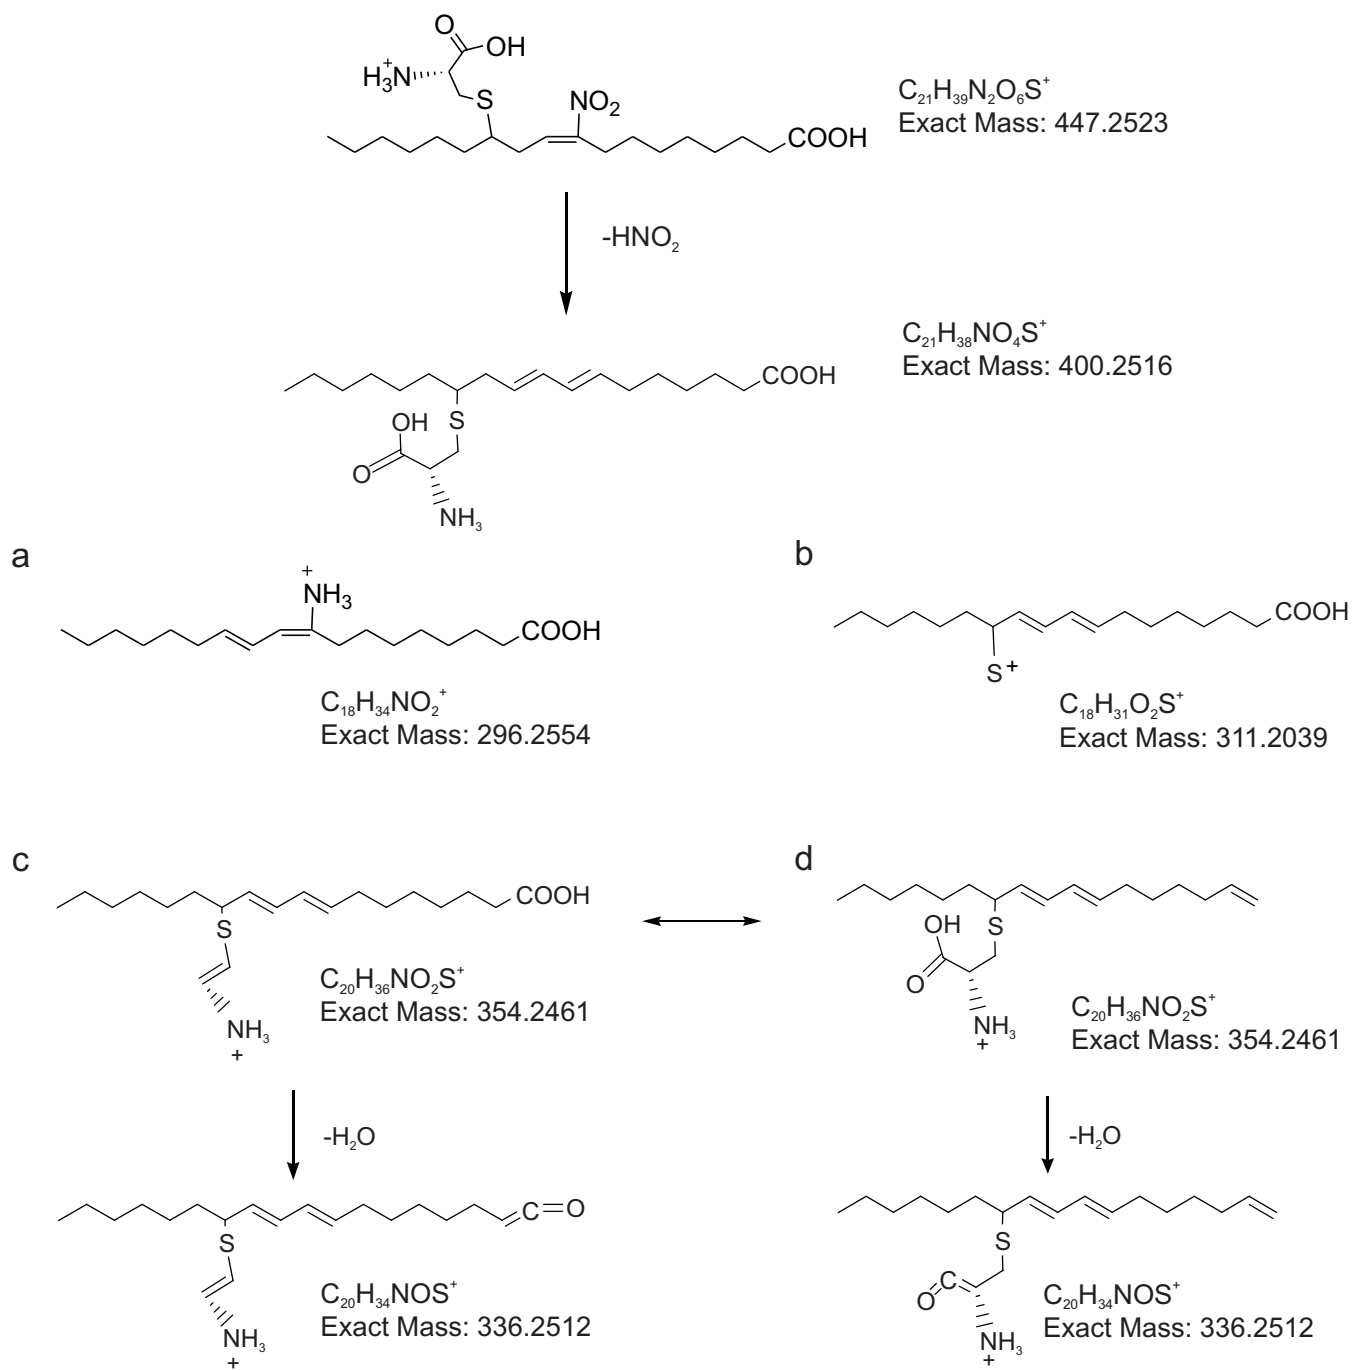

| Urine Sample # | NO <sub>2</sub> -CLA (pmol/mg creatinine) | Std. Dev. |
|----------------|-------------------------------------------|-----------|
| 1              | 0.49                                      | 0.05      |
| 2              | 3.86                                      | 0.82      |
| 3              | 2.11                                      | 0.64      |
| 4              | 3.19                                      | 0.45      |
| 5              | 0.8                                       | 0.19      |
| 6              | 4.43                                      | 1.05      |
| 7              | 3.37                                      | 1.02      |
| 8              | 41.95                                     | 5.64      |
| 9              | 42.58                                     | 2.24      |
| 10             | 1.81                                      | 0.03      |
| 11             | 1.21                                      | 0.27      |
| 12             | 24                                        | 4.17      |
| 13             | 7.26                                      | 4.39      |
| 14             | 2.56                                      | 0.78      |

**Urinary levels of NO<sub>2</sub>-CLA:**

**9.97 +/-3.98 (pmol/mg creatinine)**

**9.22 +/- 4.31 (nM)**

**Range:**

**0.49-42.58 (pmol/mg creatinine)**
